# Supplementary material for: Trends in Work Conditions and Associations with Workers’ Health in Recent 15 Years: The Role of Job Automation Probability
Source: MDPI journal article supplement (doi:10.3390/ijerph17155499), 2020-07-30
Supplement: s1 [file s1]

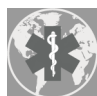

**Table S1.** Description of demographic characteristics, work conditions, and health indicators of workers from 2001 to 2016, stratified by automation probability of jobs. P value for trend analysis tests were shown.

|                               | 2001        | 2004       | 2007       | 2010        | 2013        | 2016        | <i>p</i> |
|-------------------------------|-------------|------------|------------|-------------|-------------|-------------|----------|
| Number of workers             |             |            |            |             |             |             |          |
| All workers                   | 14691       | 15288      | 17042      | 17263       | 16530       | 14948       | <0.001   |
| High automation probability   | 45.64%      | 44.86%     | 46.65%     | 45.08%      | 38.24%      | 38.48%      | <0.001   |
| Median automation probability | 36.26%      | 35.11%     | 36.09%     | 35.89%      | 43.18%      | 43.67%      | <0.001   |
| Low automation probability    | 18.10%      | 20.04%     | 18.26%     | 19.02%      | 18.58%      | 17.85%      | <0.001   |
| Average age                   |             |            |            |             |             |             |          |
| All workers                   | 38.50±9.04  | 39.11±9.24 | 39.48±9.65 | 40.15±9.86  | 41.02±10.10 | 41.84±10.32 | <0.001   |
| High automation probability   | 38.80±9.34  | 39.30±9.39 | 39.47±9.90 | 40.02±10.02 | 40.10±10.10 | 40.92±10.13 | <0.001   |
| Median automation probability | 37.77±8.64  | 38.73±9.07 | 39.60±9.45 | 40.25±9.80  | 42.46±10.12 | 43.20±10.50 | <0.001   |
| Low automation probability    | 39.20±8.96  | 39.34±9.18 | 39.26±9.40 | 40.26±9.61  | 39.54±9.61  | 40.36±9.89  | <0.001   |
| Age>55                        |             |            |            |             |             |             |          |
| All workers                   | 4.45%       | 4.44%      | 5.98%      | 7.60%       | 9.66%       | 11.81%      | <0.001   |
| High automation probability   | 5.21%       | 4.65%      | 6.54%      | 7.68%       | 8.31%       | 9.47%       | <0.001   |
| Median automation probability | 3.25%       | 4.04%      | 5.45%      | 7.47%       | 11.93%      | 15.04%      | <0.001   |
| Low automation probability    | 4.96%       | 4.67%      | 5.62%      | 7.64%       | 7.14%       | 8.96%       | <0.001   |
| Female gender                 |             |            |            |             |             |             |          |
| All workers                   | 40.75%      | 41.75%     | 43.46%     | 45.03%      | 44.20%      | 43.40%      | <0.001   |
| High automation probability   | 57.72%      | 58.21%     | 59.29%     | 60.00%      | 55.05%      | 54.09%      | <0.001   |
| Median automation probability | 20.63%      | 21.80%     | 23.87%     | 26.95%      | 34.56%      | 34.16%      | <0.001   |
| Low automation probability    | 38.25%      | 39.83%     | 42.58%     | 43.64%      | 44.32%      | 42.95%      | <0.001   |
| University or above education |             |            |            |             |             |             |          |
| All workers                   | 16.57%      | 21.58%     | 24.08%     | 30.28%      | 33.21%      | 36.11%      | <0.001   |
| High automation probability   | 7.53%       | 11.11%     | 14.79%     | 20.97%      | 21.63%      | 25.52%      | <0.001   |
| Median automation probability | 7.45%       | 12.00%     | 14.50%     | 20.77%      | 24.87%      | 29.20%      | <0.001   |
| Low automation probability    | 57.65%      | 61.80%     | 66.23%     | 70.31%      | 76.48%      | 75.86%      | <0.001   |
| <b>Work conditions</b>        |             |            |            |             |             |             |          |
| Weekly working hours          |             |            |            |             |             |             |          |
| All workers                   | 42.64±9.31  | 43.38±8.22 | 43.49±8.15 | 43.05±8.45  | 43.07±8.06  | 42.55±10.89 | <0.001   |
| High automation probability   | 42.95±8.04  | 43.38±7.15 | 43.40±7.29 | 42.78±7.84  | 43.12±7.24  | 41.87±8.73  | <0.001   |
| Median automation probability | 42.98±10.71 | 44.20±8.96 | 44.20±8.95 | 43.70±9.44  | 43.32±8.89  | 42.16±10.00 | <0.001   |

|                                       |            |             |             |            |             |             |        |
|---------------------------------------|------------|-------------|-------------|------------|-------------|-------------|--------|
| Low automation probability            | 41.09±9.10 | 41.96±8.84  | 42.32±8.40  | 42.47±7.75 | 42.37±7.55  | 41.11±9.18  | 0.436  |
| Long working hours (>48 weekly hours) |            |             |             |            |             |             |        |
| All workers                           | 9.44%      | 11.20%      | 12.84%      | 12.35%     | 13.21%      | 10.69%      | <0.001 |
| High automation probability           | 7.02%      | 8.21%       | 9.61%       | 8.94%      | 10.41%      | 8.65%       | <0.001 |
| Median automation probability         | 13.27%     | 15.54%      | 17.02%      | 16.58%     | 15.80%      | 12.56%      | 0.243  |
| Low automation probability            | 7.86%      | 10.32%      | 12.63%      | 12.45%     | 12.95%      | 10.52%      | <0.001 |
| Shift work                            |            |             |             |            |             |             |        |
| All workers                           | 14.70%     | 19.55%      | 19.36%      | 22.95%     | 20.28%      | 21.46%      | <0.001 |
| High automation probability           | 15.09%     | 18.51%      | 18.34%      | 21.16%     | 21.08%      | 21.26%      | <0.001 |
| Median automation probability         | 16.40%     | 24.27%      | 21.37%      | 24.96%     | 20.64%      | 21.84%      | <0.001 |
| Low automation probability            | 10.33%     | 13.62%      | 15.91%      | 19.87%     | 17.79%      | 20.95%      | <0.001 |
| Job demand score                      |            |             |             |            |             |             |        |
| All workers                           | -          | 57.24±15.46 | 57.70±15.43 | -          | 56.21±17.26 | 58.38±18.15 | 0.163  |
| High automation probability           | -          | 55.44±15.66 | 55.93±15.31 | -          | 54.94±17.12 | 56.64±17.87 | 0.672  |
| Median automation probability         | -          | 58.03±14.75 | 58.71±14.92 | -          | 56.39±17.20 | 58.39±18.01 | 0.637  |
| Low automation probability            | -          | 59.87±15.75 | 60.12±16.19 | -          | 58.39±17.43 | 62.09±18.53 | 0.001  |
| Job control score                     |            |             |             |            |             |             |        |
| All workers                           | -          | 51.74±14.56 | 51.48±14.00 | -          | 49.49±13.73 | 48.46±14.00 | <0.001 |
| High automation probability           | -          | 47.46±13.66 | 47.28±13.17 | -          | 45.99±12.72 | 44.94±12.75 | <0.001 |
| Median automation probability         | -          | 51.51±13.89 | 51.77±13.16 | -          | 48.67±13.46 | 47.69±13.64 | <0.001 |
| Low automation probability            | -          | 61.64±12.77 | 61.41±12.43 | -          | 58.62±12.30 | 57.98±13.22 | <0.001 |
| Job insecurity                        |            |             |             |            |             |             |        |
| All workers                           | 49.85%     | 56.05%      | 53.78%      | 47.37%     | 51.82%      | 47.86%      | <0.001 |
| High automation probability           | 53.04%     | 60.02%      | 57.21%      | 50.37%     | 57.05%      | 52.25%      | <0.001 |
| Median automation probability         | 55.27%     | 62.08%      | 58.55%      | 51.71%     | 54.20%      | 50.74%      | <0.001 |
| Low automation probability            | 30.96%     | 36.61%      | 35.80%      | 32.06%     | 35.52%      | 31.33%      | 0.399  |
| <b>Health conditions</b>              |            |             |             |            |             |             |        |
| Poor self-rated health                |            |             |             |            |             |             |        |
| All workers                           | 4.60%      | 3.99%       | 3.19%       | 3.21%      | 3.53%       | 4.14%       | 0.005  |
| High automation probability           | 5.27%      | 4.13%       | 3.38%       | 3.64%      | 3.36%       | 4.20%       | <0.001 |
| Median automation probability         | 4.08%      | 3.80%       | 3.27%       | 2.83%      | 3.99%       | 4.70%       | 0.063  |
| Low automation probability            | 3.97%      | 4.02%       | 2.57%       | 2.90%      | 2.82%       | 2.67%       | <0.001 |
| Burnout (score>50)                    |            |             |             |            |             |             |        |
| All workers                           | -          | 15.36%      | 14.08%      | -          | 11.71%      | 12.42%      | <0.001 |
| High automation probability           | -          | 14.84%      | 13.89%      | -          | 10.72%      | 11.65%      | <0.001 |
| Median automation probability         | -          | 14.83%      | 13.48%      | -          | 11.98%      | 12.18%      | <0.001 |
| Low automation probability            | -          | 17.43%      | 15.71%      | -          | 13.11%      | 14.69%      | <0.001 |
